# Supplementary material for: Nesting box imager: Contact-free, real-time measurement of activity, surface body temperature, and respiratory rate applied to hibernating mouse models
Source: PubMed Central journal article supplement (PMC6682158; doi:10.1371/journal.pbio.3000406), 2019-07-24

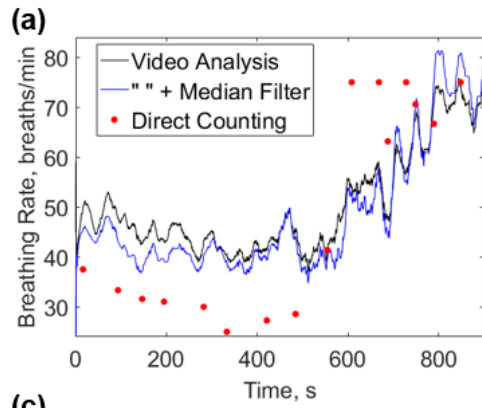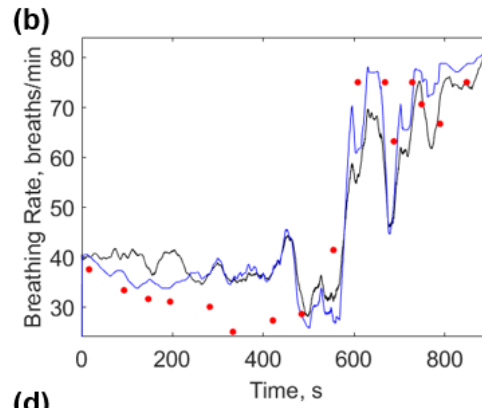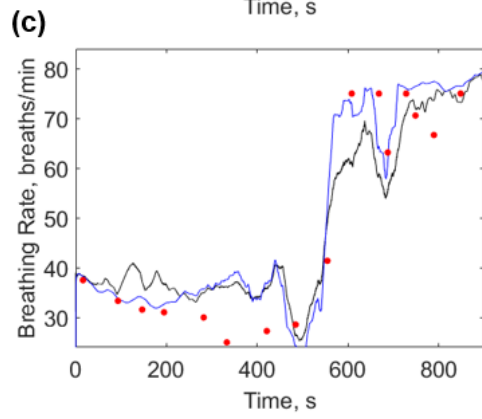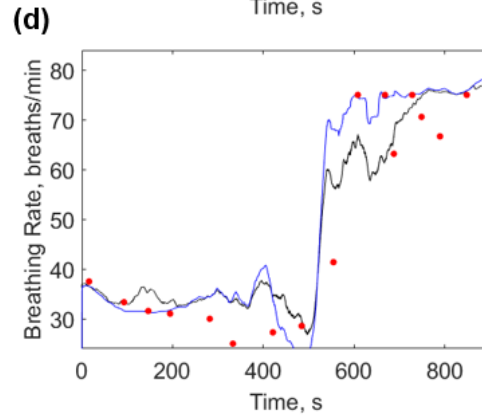

Supplement: pbio.3000406.s011.pdf [file pbio.3000406.s011.pdf]
