# Supplementary material for: Nesting box imager: Contact-free, real-time measurement of activity, surface body temperature, and respiratory rate applied to hibernating mouse models
Source: PubMed Central journal article supplement (PMC6682158; doi:10.1371/journal.pbio.3000406), 2019-07-24
Supplement: pbio.3000406.s018.pdf [file pbio.3000406.s018.pdf]

| <b>Library</b> | <b>Source</b>                                                                                   |
|----------------|-------------------------------------------------------------------------------------------------|
| opencv         | Python Package Index                                                                            |
| pylepton       | <a href="https://github.com/kekiefer/pylepton.git">https://github.com/kekiefer/pylepton.git</a> |
| ffmpeg         | Python Package Index                                                                            |
